# Supplementary material for: First record of Apanteles hemara (N.) on Leucinodes orbonalis Guenée and biodiversity of Hymenoptera parasitoids on Brinjal
Source: PeerJ. 2024 Mar 29;12:e16870. doi: 10.7717/peerj.16870 (PMC10984170; doi:10.7717/peerj.16870)
Supplement: Supplemental Information 1 [file peerj-12-16870-s001.xlsx]

## Sheet: ورقة1
Date	Parasitoids families
	Braconidae	Ichneumonidae	Chalcididae	Eulophidae	Pteromalidae	Scelionidae	Diapriidae	Platygastridae	Cynipidae	Figitidae	Aphelin-idae	Encyrtidae	Mymaridae	Dryinidae	Bethylidae	Ceraphronidae	Eurytomidae	Torymidae
2nd Nov.	14	11	0	0	1	0	2	0	2	3	0	0	0	0	0	0	0	0
3rd	21	10	1	1	2	0	8	0	5	1	0	0	1	2	0	1	1	1
4th	25	9	1	2	5	2	6	1	9	5	5	1	0	0	3	3	2	1
1st Dec.	17	6	0	0	7	5	3	0	2	1	2	3	3	0	0	1	0	1
2nd	10	3	0	3	4	0	5	0	6	2	0	6	1	3	0	0	3	0
3rd	10	1	2	0	3	0	1	1	2	0	3	0	0	0	1	1	0	0
4th	11	0	0	4	0	3	3	2	7	3	4	0	1	0	1	2	1	1
1st Jan.	10	1	0	1	0	2	1	0	0	2	2	1	0	0	0	0	0	0
2nd	10	4	0	1	2	1	2	2	1	1	0	0	0	0	0	1	0	0
3rd	8	2	0	0	1	0	3	1	2	1	0	0	1	0	1	0	0	0
4th	6	0	0	0	3	0	0	0	0	1	0	0	0	0	0	0	0	0
1st Feb.	10	2	0	4	0	0	0	0	0	0	0	0	0	0	0	0	1	0
2nd	12	4	2	6	0	0	1	0	3	2	2	0	1	0	0	1	0	0
3rd	15	1	3	5	3	3	3	0	4	0	1	1	0	0	2	0	2	0
4th	16	2	4	2	4	0	4	0	0	3	2	0	2	1	0	0	0	0
1st Mar.	16	2	6	7	2	1	5	0	1	1	0	2	0	0	1	1	1	0
2nd	18	5	5	1	0	0	2	0	0	1	0	0	1	0	0	0	1	0
3rd	10	2	4	3	0	0	1	0	1	2	0	0	0	0	4	0	0	0
4th	8	1	3	1	3	0	0	0	0	0	0	0	0	0	0	0	0	0
1st April	11	0	2	2	0	0	0	0	3	0	0	0	0	0	0	0	0	0
2nd	4	0	0	0	1	0	0	0	0	1	0	0	0	0	0	0	0	0
3rd	5	0	0	0	0	0	0	0	0	0	0	0	0	0	0	0	0	0
3rd May	1	0	0	2	3	2	1	0	0	0	0	0	0	0	0	0	0	0
4th	2	1	0	1	2	2	1	2	0	0	0	1	1	0	0	0	0	0
1st Jun.	5	4	1	2	2	5	0	3	0	1	0	2	0	1	1	1	0	0
2nd	5	3	0	1	1	12	3	2	2	1	0	0	0	0	0	0	1	1
3rd	12	5	1	2	3	6	1	3	0	2	0	1	0	1	0	0	0	0
4th	13	6	0	3	3	9	0	2	1	0	0	0	0	1	2	1	1	1
1st Jul.	5	1	0	3	2	5	0	1	0	0	0	1	0	1	0	0	0	0
2nd	8	3	3	5	4	4	2	2	1	0	2	1	1	0	4	1	1	1
3rd	8	3	1	0	0	6	0	1	0	2	0	2	0	0	0	2	2	0
4th	9	4	2	1	2	8	1	0	0	2	1	0	0	1	1	0	0	0
1st Aug.	10	5	0	2	2	3	0	4	2	0	0	0	2	2	3	1	1	0
2nd	11	4	0	1	3	6	2	1	2	0	0	3	0	0	1	0	0	0
3rd	19	8	2	4	0	4	3	2	0	1	1	1	1	0	0	2	1	1
4th	10	6	3	2	1	3	1	1	1	0	0	0	0	0	0	0	0	1
1st Sep.	6	4	4	2	0	6	2	2	0	2	0	2	1	1	1	0	0	0
2nd	5	3	2	1	2	3	0	0	2	0	0	1	0	0	0	0	0	0
3rd	4	2	1	1	1	5	2	0	0	0	0	0	0	0	0	0	0	0
4th	3	1	1	0	0	3	3	1	1	0	0	0	0	1	2	0	1	0
1st Oct	2	0	0	1	1	2	1	0	2	0	0	2	0	0	0	1	0	2
2nd	2	1	0	0	0	1	0	0	0	0	0	0	0	0	0	0	0	0
3rd	1	0	0	0	1	0	0	1	0	0	0	0	0	0	0	0	0	1
4th	1	0	0	1	0	2	0	0	0	0	0	0	0	0	0	0	0	0
